# Supplementary material for: 2,4-D and IAA Amino Acid Conjugates Show Distinct Metabolism in Arabidopsis
Source: PubMed Central journal article supplement (PMC4951038; doi:10.1371/journal.pone.0159269), 2016-07-19
Supplement: pone.0159269.s002.pdf [file pone.0159269.s002.pdf]

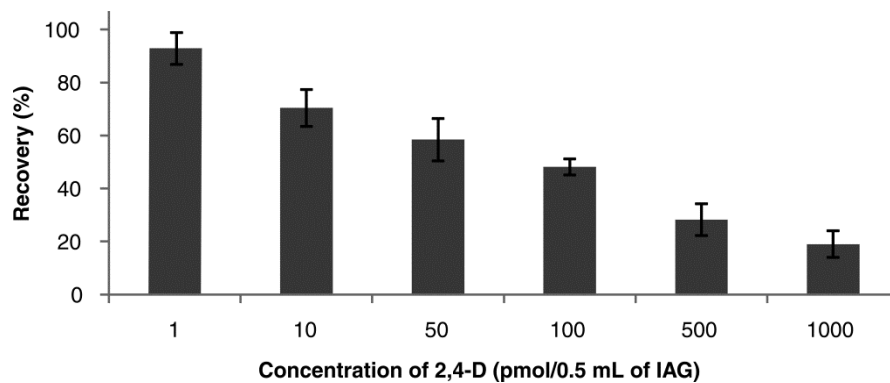

**S2 Fig. Capacity of the immunoaffinity gel (IAG) with immobilized E2/G2 antibodies presented as analyte recoveries observed in tests with 0.05–1 nmol of 2,4-D.** Solution of 2,4-D with concentrations ranging from 1 to 1000 pmol in methanol:PBS buffer (5:95, v/v) were applied onto 0.5 ml of IAG. The eluates were evaporated to dryness, dissolved in 50  $\mu$ L of 35% methanol and analysed by UHPLC-ESI(-)-MS/MS (10  $\mu$ L of sample injected). Each spiking level was then determined, compared with the concentration of appropriate standard solution and the recoveries were calculated.
