# Supplementary material for: 2,4-D and IAA Amino Acid Conjugates Show Distinct Metabolism in Arabidopsis
Source: PubMed Central journal article supplement (PMC4951038; doi:10.1371/journal.pone.0159269), 2016-07-19
Supplement: pone.0159269.s003.pdf [file pone.0159269.s003.pdf]

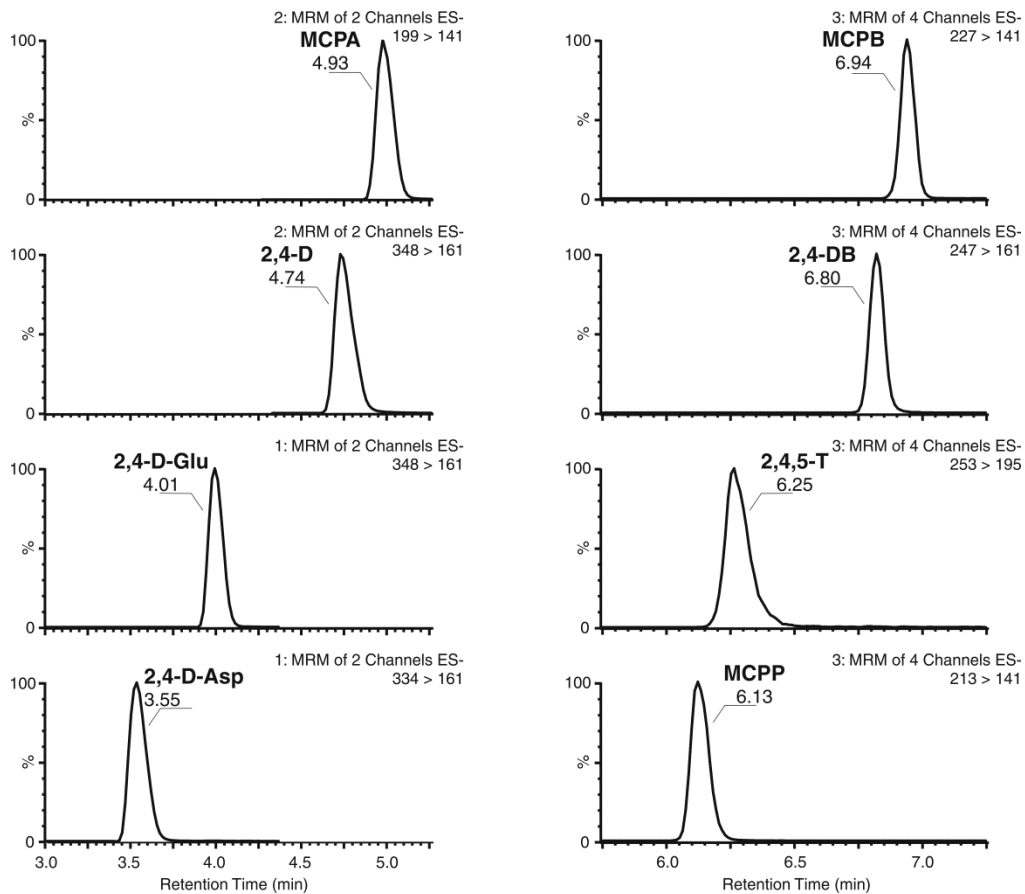

**S3 Fig. Chromatographic separation of 2,4-D and its metabolites/structural analogues by UHPLC-(ESI)-MS/MS.** The figure shows the MRM chromatograms of 8 analytes represented by 10 pmol of each compound per injection using an Acquity UPLC<sup>®</sup> CSH<sup>™</sup> C18 (2.1x100 mm, 1.7  $\mu$ m) column.
