# Supplementary material for: 2,4-D and IAA Amino Acid Conjugates Show Distinct Metabolism in Arabidopsis
Source: PubMed Central journal article supplement (PMC4951038; doi:10.1371/journal.pone.0159269), 2016-07-19
Supplement: pone.0159269.s006.pdf [file pone.0159269.s006.pdf]

**S1 Table. Preparation scheme and structural characteristics of 2,4-D-Asp.** The purity of the synthesized compounds was confirmed by high performance liquid chromatography-liquid chromatography-diode array detection (Gold System, Beckman, Switzerland). The elemental composition of the prepared compounds was confirmed by HPLC-(ESI+)-HRMS (Q-TOF micro™ Waters MS Technologies, UK). Accurate masses were calculated and used for the determination of the elemental composition of the analytes with fidelity better than 3 ppm. NMR spectra were recorded on a JEOL ECA-500 spectrometer operating at frequencies of 500 MHz (<sup>1</sup>H) and 125 MHz (<sup>13</sup>C) and on a Bruker Avance 300 spectrometer with frequencies of 300 (<sup>1</sup>H) and 75 MHz (<sup>13</sup>C). Tetramethylsilane (TMS) was used as the internal standard.

**Scheme 1**

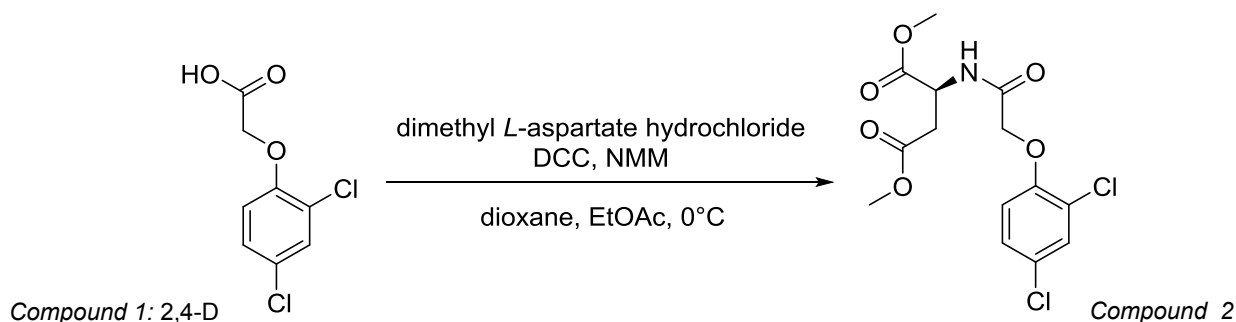

**Compound 2: (S)-Dimethyl-2-(((2,4-dichlorophenoxy)acetyl)amino)butanedioate** (obtained in 94 % yield)

<sup>1</sup>H-NMR (500 Hz, CDCl<sub>3</sub>, δ): 7.75 (1H, d, J = 7.95 Hz, N-H), 7.40 (1H, d, J = 2.45 Hz, H-3'), 7.20 (1H, dd, J = 9.17 Hz, J = 2.45 Hz, H-5'), 6.82 (1H, d, J = 9.17 Hz, H-6'), 4.94 (1H, dt, J = 8.56 Hz, J = 4.28 Hz, H-2), 4.54-4.50 (2H, m, CH<sub>2</sub>-O), 3.76 (3H, s, CH<sub>3</sub>-O), 3.67 (3H, s, CH<sub>3</sub>-O), 3.09 (1H, dd, J = 17.12 Hz, J = 4.28 Hz, H-1a), 2.87 (1H, dd, J = 17.12 Hz, J = 4.28, H-1b).

**Scheme 2**

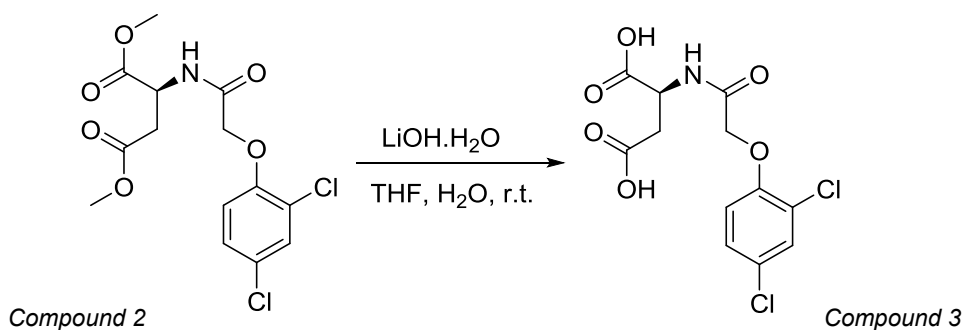

**Compound 3: (2-((2,4-dichlorophenoxy)acetyl)-L-aspartic acid)** (obtained in 32 % yield)

<sup>1</sup>H-NMR (500 Hz, DMSO-*d*<sub>6</sub>, δ): 12.95 (2H, bs, CO<sub>2</sub>H), 8.25 (1H, d, J = 7.95 Hz, N-H), 7.59 (1H, d, J = 2.45 Hz, H-3'), 7.33 (1H, dd, J = 9.17 Hz, J = 2.45 Hz, H-5'), 7.06 (1H, d, J = 9.17 Hz, H-6'), 4.66 (2H, s, CH<sub>2</sub>-O), 4.58-4.54 (1H, m, H-2), 2.72-2.64 (2H, m, H-3).

<sup>13</sup>C-NMR (125 Hz, DMSO-*d*<sub>6</sub>, δ): 172.4 (CO<sub>2</sub>H), 172.3 (CO<sub>2</sub>H), 167.2 (C-NH), 152.7 (C-1'), 129.7 (CH-3'), 128.3 (CH-5'), 125.8 (C-4'), 123.0 (C-1'), 115.9 (C-6'), 68.0 (CH<sub>2</sub>-O), 48.5 (CH-2), 36.3 (CH<sub>2</sub>-1).

HRMS: (ESI-), [M-H]<sup>-</sup>, *m/z* 333.9890 (C<sub>12</sub>H<sub>10</sub>NO<sub>6</sub>Cl<sub>2</sub>, Δ 1.5 ppm).

<sup>24</sup>α<sub>D</sub> = 15.3° (in H<sub>2</sub>O + NaOH (2.2 equiv., c = 0.5 g/100ml))

**Structural characteristics of <sup>13</sup>C,<sup>15</sup>N-2,4D-L-aspartic acid**

<sup>1</sup>H-NMR (500 Hz, DMSO-*d*<sub>6</sub>, δ): 12.90 (2H, bs, CO<sub>2</sub>H), 8.29 (1H, ddd, J = 92.6 Hz, J = 8.2 Hz, J = 3.6 Hz, N-H), 7.60 (1H, d, J = 2.4 Hz, H-3'), 7.33 (1H, dd, J = 8.9 Hz, J = 2.4 Hz, H-5'), 7.06 (1H, d, J = 8.9 Hz, H-6'), 4.66 (2H, dd, J = 147.6 Hz, J = 3.7 Hz, CH<sub>2</sub>-O), 4.62 (1H, bs, H-2), 2.71 (2H, bs, H-3).
