# Supplementary material for: 2,4-D and IAA Amino Acid Conjugates Show Distinct Metabolism in Arabidopsis
Source: PubMed Central journal article supplement (PMC4951038; doi:10.1371/journal.pone.0159269), 2016-07-19
Supplement: pone.0159269.s007.pdf [file pone.0159269.s007.pdf]

**S2 Table. Preparation scheme and structural characteristics of 2,4-D-Glu.** The purity of the synthesized compounds was confirmed by high performance liquid chromatography-liquid chromatography-diode array detection (Gold System, Beckman, Switzerland). The elemental composition of the prepared compounds was confirmed by HPLC-(ESI+)-HRMS (Q-TOF micro™ Waters MS Technologies, UK). Accurate masses were calculated and used for the determination of the elemental composition of the analytes with fidelity better than 3 ppm. NMR spectra were recorded on a JEOL ECA-500 spectrometer operating at frequencies of 500 MHz (<sup>1</sup>H) and 125 MHz (<sup>13</sup>C) and on a Bruker Avance 300 spectrometer with frequencies of 300 (<sup>1</sup>H) and 75 MHz (<sup>13</sup>C). Tetramethylsilane (TMS) was used as the internal standard.

**Scheme 3**

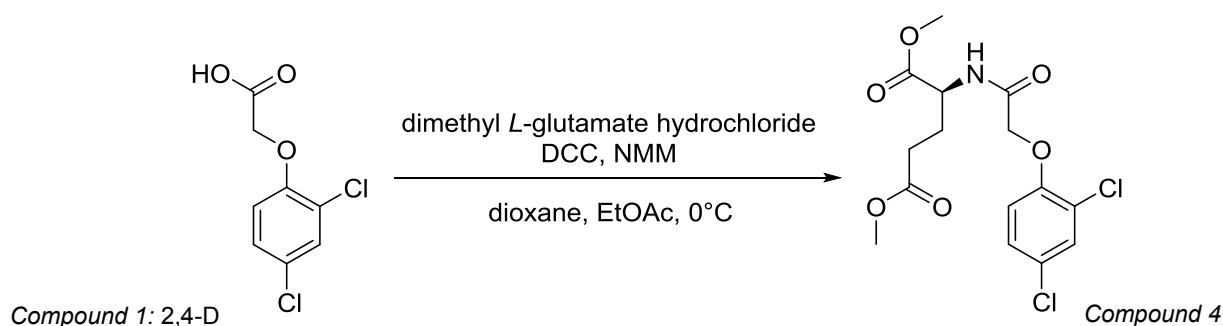

**Compound 4: (S)-Dimethyl-2-((2,4-dichlorophenoxy)acetyl)amino)pentanedioate** (obtained in 95 % yield)

*<sup>1</sup>H-NMR* (500 Hz, CDCl<sub>3</sub>, δ): 7.41 (1H, d, *J* = 2.45 Hz, H-3'), 7.39 (1H, bs, N-H), 7.21 (1H, dd, *J* = 8.56 Hz, *J* = 2.45 Hz, H-5'), 6.83 (1H, d, *J* = 8.5 Hz, H-6'), 4.72 (1H, dt, *J* = 7.95 Hz, *J* = 5.50 Hz, H-2), 4.56-4.48 (2H, m, CH<sub>2</sub>-O), 3.76 (3H, s, CH<sub>3</sub>-O), 3.65 (3H, s, CH<sub>3</sub>-O), 2.43-2.25 (3H, m, H-4, H-3), 2.10-2.04 (1H, m, H-3).

**Scheme 4**

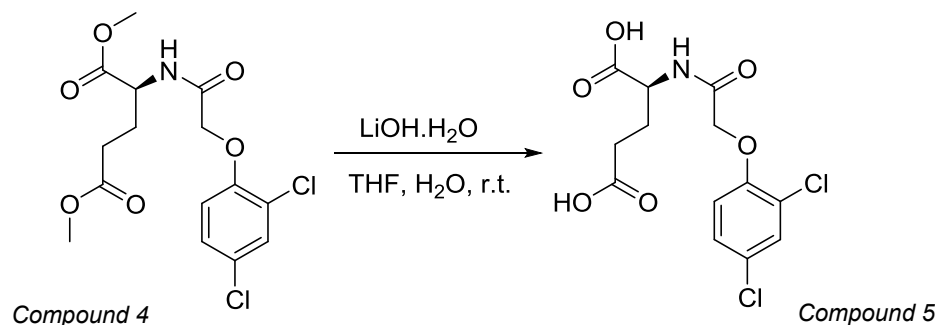

**Compound 5: (2-((2,4-dichlorophenoxy)acetyl)-L-glutamic acid** (obtained in 30 % yield)

*<sup>1</sup>H-NMR* (500 Hz, DMSO-*d*<sub>6</sub>, δ): 12.50 (2H, bs, CO<sub>2</sub>H), 8.27 (1H, d, *J* = 7.34 Hz, N-H), 7.58 (1H, d, *J* = 3.06 Hz, H-3'), 7.32 (1H, dd, *J* = 8.56 Hz, *J* = 2.45 Hz, H-5'), 7.04 (1H, d, *J* = 9.17 Hz, H-6'), 4.63-4.67 (2H, m, CH<sub>2</sub>-O), 4.27-4.23 (1H, m, H-2), 2.25 (2H, t, *J* = 7.34 Hz, H-4), 1.99-1.95 (1H, m, H-3), 1.84-1.80 (1H, m, H-3).

*<sup>13</sup>C-NMR* (125 Hz, DMSO-*d*<sub>6</sub>, δ): 174.3 (CO<sub>2</sub>H), 173.3 (CO<sub>2</sub>H), 167.4 (C-NH), 152.9 (C-1'), 129.8 (C-3'), 128.4 (C-5'), 125.5 (C-4'), 122.9 (C-2'), 115.8 (C-6'), 67.9 (CH<sub>2</sub>-O), 51.6 (CH-2), 30.6 (CH<sub>2</sub>-4), 26.9 (CH<sub>2</sub>-3).

*HRMS*: (ESI<sup>-</sup>), [M-H]<sup>-</sup>, *m/z* 348.0037 (C<sub>13</sub>H<sub>12</sub>NO<sub>6</sub>Cl<sub>2</sub>, Δ -1.4 ppm).

<sup>24</sup>α<sub>D</sub> = 12.8° (in H<sub>2</sub>O + NaOH (2.2 equiv., c = 0.5 g/100ml))

**Structural characteristics of <sup>13</sup>C<sub>2</sub>, <sup>15</sup>N-2,4D-L-glutamic acid**

*<sup>1</sup>H-NMR* (500 Hz, DMSO-*d*<sub>6</sub>, δ): 12.60 (2H, bs, CO<sub>2</sub>H), 8.29 (1H, bd, *J* = 91.7 Hz, N-H), 7.59 (1H, s, H-3'), 7.33 (1H, d, *J* = 8.9 Hz, H-5'), 7.03 (1H, d, *J* = 8.9 Hz, H-6'), 4.68 (2H, dd, *J* = 147.9 Hz, *J* = 9.7 Hz, CH<sub>2</sub>-O), 4.28 (1H, bs, H-2), 2.26 (2H, t, *J* = 7.3 Hz, H-4), 2.02 (1H, bs, H-3α), 1.82 (1H, bs, H-3β).
