# Supplementary material for: 2,4-D and IAA Amino Acid Conjugates Show Distinct Metabolism in Arabidopsis
Source: PubMed Central journal article supplement (PMC4951038; doi:10.1371/journal.pone.0159269), 2016-07-19
Supplement: pone.0159269.s008.pdf [file pone.0159269.s008.pdf]

**S3 Table. Optimized UHPLC-(ESI-)-MS/MS parameters.** The precursor and product ions of the studied compounds (MRM transition) and optimized cone/collision energies are listed for each analyte. The retention time stability, limits of detection, dynamic linear range, method linearity (correlation coefficients,  $R^2$ ) are shown for UHPLC-ESI(-)-MS/MS analysis. The settings of the mass spectrometer in negative electrospray (ESI-) mode were as follows: Capillary Coltage, 3.0 kV; Cone Voltage, 21-30 V; Collision Energy, 10-22 eV; Low/High Resolutions, 3.0/15.0; Desolvation/Source Temperatures, 120/550°C. The gas flows were set to 0.21 ml/min of collision gas (Argon), 1000 l/h of desolvation gas and 70 l/h of cone gas (Nitrogen).

| Compound                                                      | MRM transition | Cone Voltage [V] | Collision Energy [eV] | Retention time <sup>a</sup> [min] | LOD <sup>b</sup> [fmol] | Linear range [pmol] | $R^2$  |
|---------------------------------------------------------------|----------------|------------------|-----------------------|-----------------------------------|-------------------------|---------------------|--------|
| <b>2,4-D</b>                                                  | 219 > 161      | 21               | 10                    | 4.742 ± 0.009                     | 23                      | 0.05–250            | 0.9995 |
| <b>[<sup>2</sup>H<sub>5</sub>]-2,4-D</b>                      | 224 > 164      |                  |                       |                                   |                         |                     |        |
| <b>2,4-D-Asp</b>                                              | 334 > 161      | 30               | 22                    | 3.551 ± 0.011                     | 20                      | 0.05–250            | 0.9991 |
| <b>[<sup>13</sup>C<sub>2</sub>, <sup>15</sup>N]-2,4-D-Asp</b> | 337 > 161      |                  |                       |                                   |                         |                     |        |
| <b>2,4-D-Glu</b>                                              | 348 > 161      | 25               | 22                    | 4.014 ± 0.006                     | 19                      | 0.05–250            | 0.9989 |
| <b>[<sup>13</sup>C<sub>2</sub>, <sup>15</sup>N]-2,4-D-Glu</b> | 351 > 161      |                  |                       |                                   |                         |                     |        |
| <b>2,4-DB</b>                                                 | 247 > 161      | 17               | 9                     | 6.801 ± 0.008                     | 19                      | 0.05–250            | 0.9986 |
| <b>MCPA</b>                                                   | 199 > 141      | 15               | 12                    | 4.932 ± 0.004                     | 14                      | 0.05–250            | 0.9991 |
| <b>MCPB</b>                                                   | 227 > 141      | 18               | 9                     | 6.941 ± 0.005                     | 15                      | 0.05–250            | 0.9975 |
| <b>MCPP</b>                                                   | 213 > 141      | 20               | 11                    | 6.134 ± 0.008                     | 10                      | 0.05–250            | 0.9992 |
| <b>2,4,5-T</b>                                                | 253 > 195      | 20               | 10                    | 6.251 ± 0.006                     | 150                     | 0.5–250             | 0.9987 |

<sup>a</sup> Values are means ± SD (n = 10); <sup>b</sup> Lower Limit of Detection (LOD) defined as a signal-to-noise ratio of 3:1.
