# Supplementary material for: 2,4-D and IAA Amino Acid Conjugates Show Distinct Metabolism in Arabidopsis
Source: PubMed Central journal article supplement (PMC4951038; doi:10.1371/journal.pone.0159269), 2016-07-19
Supplement: pone.0159269.s009.pdf [file pone.0159269.s009.pdf]

**S4 Table. Characterization of monoclonal antibodies E2/G2 and immunoaffinity gel by 2,4-D structural analogues.** Percentage of cross reactivity (CR) was calculated using the equation:  $CR(\%) = IC_{50}(2,4-D)/IC_{50}(\text{cross reactant}) \times 100$ , where  $IC_{50}$  is the concentration of a competitor (cross reactant) resulting in 50% reduction of conjugate binding in direct ELISA system. For characterization of an immunoaffinity gel (IAG) with immobilised E2/G2 antibodies, mixtures of selected 2,4-D structural analogues with concentrations ranging from 1 to 300 pmol were applied onto 0.5 ml of IAG. Each spiking level was then determined by UHPLC-ESI(-)-MS/MS, compared with the concentration of appropriate standard solution and the recoveries were calculated. Values are means  $\pm$  SD (n = 3); n.d. = not detected.

| Compound                                          | CR (%) | Recovery (%)   |                |                |                |                |                |
|---------------------------------------------------|--------|----------------|----------------|----------------|----------------|----------------|----------------|
|                                                   |        | 1 pmol         | 5 pmol         | 10 pmol        | 50 pmol        | 100 pmol       | 300 pmol       |
| 2,4-D                                             | 100.0  | 91.5 $\pm$ 7.9 | 75.3 $\pm$ 4.3 | 69.4 $\pm$ 4.9 | 59.2 $\pm$ 2.3 | 47.6 $\pm$ 7.9 | 32.6 $\pm$ 5.8 |
| 4-(2,4-dichlorophenoxy) butyric acid (2,4-DB)     | 0.2    | n.d.           | 10.5 $\pm$ 3.2 | 14.7 $\pm$ 1.9 | 8.7 $\pm$ 0.7  | 2.5 $\pm$ 0.4  | 1.0 $\pm$ 0.3  |
| 2-methyl-4-chlorophenoxy acetic acid (MCPA)       | 8.04   | 32.4 $\pm$ 3.5 | 23.6 $\pm$ 1.0 | 15.3 $\pm$ 1.6 | 13.8 $\pm$ 1.5 | 4.0 $\pm$ 0.4  | 1.9 $\pm$ 0.3  |
| 4-(2-methyl-4-chlorophenoxy) butyric acid (MCPB)  | 0.9    | n.d.           | n.d.           | n.d.           | n.d.           | n.d.           | 0.6 $\pm$ 0.1  |
| 2-(2-methyl-4-chlorophenoxy)propionic acid (MCPB) | <0.2   | n.d.           | n.d.           | n.d.           | n.d.           | 0.3 $\pm$ 0.1  | 0.2 $\pm$ 0.0  |
| 2,4,5-trichlorphenoxyacetic acid (2,4,5-T)        | 3.8    | n.d.           | n.d.           | 11.9 $\pm$ 2.8 | 9.0 $\pm$ 0.4  | 2.3 $\pm$ 0.5  | 1.1 $\pm$ 0.3  |
| 2,4-D-methylester (2,4-D-Me)                      | 87.73  |                |                |                |                |                |                |
| 2-chlorphenoxyacetic acid                         | 0.9    |                |                |                |                |                |                |
| 2-methyl-4-chlorphenoxyacetic acid                | <0.2   |                |                |                |                |                |                |
| 2-methyl-4,6-dichlorphenoxyacetic acid            | <0.2   |                |                |                |                |                |                |
| 2-methyl-6-chlorphenoxyacetic acid                | <0.2   |                |                |                |                |                |                |
| 4-chlorphenoxyacetic acid                         | 0.9    |                |                |                |                |                |                |
| 2,3-dichlorphenoxyacetic acid                     | 1.6    |                |                |                |                |                |                |
| 3,4-dichlorphenoxyacetic acid                     | 2.7    |                |                |                |                |                |                |
| 2-(2,4-dichlorphenoxy) propionic acid             | 0.4    |                |                |                |                |                |                |
| 2,4-dichlorphenol                                 | 1.72   |                |                |                |                |                |                |
| 2-methyl-4-chlorphenol                            | 0.5    |                |                |                |                |                |                |
| 2,4-dichloranisole                                | 1.5    |                |                |                |                |                |                |
| 3,4-dimethylphenol                                | <0.2   |                |                |                |                |                |                |
| pentachlorphenol                                  | 0.5    |                |                |                |                |                |                |
