# Supplementary material for: 2,4-D and IAA Amino Acid Conjugates Show Distinct Metabolism in Arabidopsis
Source: PubMed Central journal article supplement (PMC4951038; doi:10.1371/journal.pone.0159269), 2016-07-19
Supplement: pone.0159269.s010.pdf [file pone.0159269.s010.pdf]

**S5 Table. Process efficiency and method validation (method precision and accuracy) for the ion-exchange and class-specific purification procedure.** Extracts of 15 mg FW *Arabidopsis* leaves were spiked with three different concentrations of authentic standards (Low – 0.5 pmol; Medium – 5 pmol; High – 50 pmol) and known concentration of the appropriate internal labeled standards (10 pmol), purified by two-step isolation using the Oasis® MAX sorbent and the immunoaffinity gel, then directly analyzed by UHPLC-ESI(-)-MS/MS.

| Compound         | Process Efficiency (%) <sup>a</sup> | Method precision (% RSD) <sup>b</sup> |        |      | Method accuracy (% bias) <sup>b</sup> |        |      |
|------------------|-------------------------------------|---------------------------------------|--------|------|---------------------------------------|--------|------|
|                  |                                     | Low                                   | Medium | High | Low                                   | Medium | High |
| <b>2,4-D</b>     | 66 ± 17                             | 6.2                                   | 1.4    | 4.6  | -3.6                                  | 3.3    | 14.6 |
| <b>2,4-D-Asp</b> | 16 ± 6                              | 9.6                                   | 3.3    | 10.6 | 12.9                                  | 1.2    | 6.0  |
| <b>2,4-D-Glu</b> | 28 ± 8                              | 8.2                                   | 2.3    | 7.3  | 18.3                                  | 4.6    | -3.8 |

<sup>a</sup> Values are means ± SD (n = 12); <sup>b</sup> All analyses were performed in quadruplicate.
